# Supplementary material
Source: MDPI journal article supplement (https://www.mdpi.com/1999-4907/6/7/2296)
Supplement: s1 [file s1]

Supplementary Materials

**Table S1.** Summary of geographical location (latitude, LAT; longitude, LON; altitude, ALT), climate (mean annual temperature, MAT; mean annual precipitation, MAP), and tree growth (diameter at breast height, DBH, and mean height (MHT) for five dominant tree), and the leaf discrimination for carbon 13 (Leaf δ13C) for sample populations of *Quercus variabilis* across Eastern China.

| **Plot No.** | **Locations** | **Location Code** | **LAT (°)** | **LON (°)** | **ALT (m)** | **MAT (°C)** | **MAP (mm)** | **DBH(cm)** | **MHT (m)** | **Leaf δ13C** |
| --- | --- | --- | --- | --- | --- | --- | --- | --- | --- | --- |
| 1 | Tianlin, Guangxi | TL | 24.43 | 105.93 | 700 | 20.0 | 1125 | 23.88 | 15.0 | −27.22 ± 0.26 |
| 2 | Anning, Yunnan | AN | 24.98 | 102.44 | 1826 | 14.1 | 955 | 27.48 | 12.0 | −24.82 ± 0.42 |
| 3 | Kunming, Yunnan | KM | 25.14 | 102.74 | 1955 | 14.5 | 999 | 26.28 | 12.5 | −24.39 ± 0.21 |
| 4 | Dehua, Fujian | DH | 25.75 | 118.31 | 484 | 17.5 | 1850 | 27.80 | 11.0 | −29.88 ± 0.16 |
| 5 | Shaoguan, Guangdong | SG | 25.92 | 113.08 | 500 | 19.9 | 1705 | - | - | −28.52 ± 0.95 |
| 6 | Huaihua, Hunan | HH | 27.51 | 110.11 | 455 | 17.3 | 1430 | 12.70 | 9.0 | −28.66 ± 0.25 |
| 7 | Pucheng, Fujian | PC | 28.03 | 118.68 | 704 | 17.4 | 1782 | 25.94 | 12.0 | −29.13 ± 0.31 |
| 8 | Yongxiu, Jiangxi | YX | 29.08 | 115.62 | 360 | 17.0 | 1038 | 35.50 | 18.0 | −28.73 ± 0.24 |
| 9 | Qimen, Anhui | QM | 29.60 | 117.54 | 459 | 16.2 | 1620 | 42.96 | 13.0 | −29.08 ± 0.17 |
| 10 | Hangzhou, Zhejiang | HZ | 30.19 | 120.00 | 349 | 15.5 | 1389 | - | 13.0 | −27.79 ± 0.35 |
| 11 | Huoshan, Anhui | HS | 31.35 | 116.08 | 659 | 14.0 | 1391 | 32.58 | 14.0 | −29.50 ± 0.31 |
| 12 | Nanzhang, Hubei | NZ | 31.75 | 111.93 | 237 | 15.5 | 885 | 28.76 | 15.7 | −28.11 ± 0.21 |
| 13 | Jurong, Jiangsu | JR | 32.13 | 119.20 | 160 | 15.1 | 1053 | 21.30 | 14.0 | −28.58 ± 0.32 |
| 14 | Xinyang, Henan | XY | 32.14 | 113.85 | 163 | 15.2 | 1087 | 16.84 | 13.6 | −26.94 ± 0.44 |
| 15 | Fengyang, Anhui | FY | 32.64 | 117.56 | 28 | 15.4 | 1035 | - | - | −28.44 ± 0.41 |
| 16 | Ankang, Shannxi | AK | 32.66 | 109.03 | 370 | 15.0 | 1050 | 30.10 | 14.5 | −28.52 ± 0.70 |
| 17 | Neixiang, Henan | NX | 33.50 | 111.92 | 1112 | 14.2 | 788 | 31.58 | 20.0 | −28.32 ± 0.30 |
| 18 | Xiaoxian, Anhui | XX | 34.01 | 117.06 | 117 | 14.2 | 753 | 26.40 | 16.0 | −25.87 ± 0.33 |
| 19 | Sanmenxia, Henan | SM | 34.49 | 111.22 | 1121 | 13.3 | 495 | 13.70 | 11.0 | −25.65 ± 0.37 |
| 20 | Huanglong, Shannxi | HL | 35.53 | 110.27 | 960 | 12.6 | 571 | 29.22 | 14.0 | −26.58 ± 0.25 |
| 21 | Xingtai, Hebei | XT | 37.08 | 113.83 | 801 | 9.0 | 593 | 25.80 | 16.0 | −25.84 ± 0.26 |

**Table S1.** *Cont.*

| **Plot No.** | **Locations** | **Location Code** | **LAT (°)** | **LON (°)** | **ALT (m)** | **MAT (°C)** | **MAP (mm)** | **DBH(cm)** | **MHT (m)** | **Leaf δ13C** |
| --- | --- | --- | --- | --- | --- | --- | --- | --- | --- | --- |
| 22 | Dalian, Liaoning | DL | 39.11 | 121.80 | 180 | 10.2 | 635 | 19.60 | 9.3 | −26.88 ± 0.39 |
| 23 | Yixian, Hebei | YI | 39.47 | 115.48 | 516 | 11.4 | 558 | 15.50 | 9.4 | −25.97 ± 0.19 |
| 24 | Zhuanghe, Liaoning | ZH | 39.98 | 122.96 | 250 | 8.8 | 735 | 28.87 | 14.0 | −27.37 ± 0.21 |
| 25 | Pinggu, Beijing | PG | 40.25 | 117.12 | 260 | 9.7 | 542 | 15.40 | 11.2 | −24.88 ± 0.36 |

**Table S2.**Results of Pearson correlation coefficients between the key climate and geographic variables.

|  | **LON** | **ALT** | **MAT** | **MAP** |
| --- | --- | --- | --- | --- |
| LAT | 0.504** | −0.382 | −0.862*** | −0.729*** |
| LON |  | −0.743*** | −0.272 | 0.106 |
| ALT |  |  | −0.009 | −0.094 |
| MAT |  |  |  | 0.755*** |

Latitude (LAT); longitude (LON); altitude (ALT) mean annual temperature (MAT); mean annual precipitation (MAP); *: *p*< 0.05; **: *p* < 0.01; ***: *p* < 0.001.
